# Supplementary material
Source: PubMed Central journal article supplement (PMC2922978)
Supplement: NIHMS126021-supplement-Supp_Data_01.pdf [file NIHMS126021-supplement-Supp_Data_01.pdf]

**Online Repository:**

A Schroeder<sup>1</sup>, R Kumar<sup>2</sup>, JA Pongracic<sup>2</sup>, CL Sullivan<sup>1</sup>, DM Caruso<sup>1</sup>, J Costello<sup>1</sup>, KE Meyer<sup>1</sup>, Y Vucic<sup>1</sup>, R Gupta<sup>1</sup>, JS Kim<sup>2</sup>, R Fuleihan<sup>2</sup>, X Wang<sup>1</sup>

<sup>1</sup>The Mary Ann and J. Milburn Smith Child Health Research Program, Children's Memorial Hospital and Children's Memorial Research Center Chicago, IL;

<sup>2</sup>Division of Allergy and Immunology, Children's Memorial Hospital, Chicago, IL

Correspondence should be addressed to:

Rajesh Kumar, MD

Children's Memorial Hospital  
2300 Children's Plaza, box #60

Chicago Illinois

USA 60614

Tel: 773 – 327- 3710

Fax: 773 – 327 - 3790

Email: [rkumar@childrensmemorial.org](mailto:rkumar@childrensmemorial.org)

Source(s) of support: The parent study is in part supported by the Food Allergy Project,

NIEHS (PI: Wang, R21 ES011666), and NICHD (PI: Wang, R01 HD041702).

Table E1. Relationship between symptomatic food allergy and asthma in children  $\geq 6$  years old (n=443)

| Food Allergy Status | N   | Asthma<br>Diagnosis | OR   | 95% CI         |                | p                   |
|---------------------|-----|---------------------|------|----------------|----------------|---------------------|
|                     |     | Yes                 |      | Lower<br>bound | Upper<br>bound |                     |
| Any Food Allergen   | 152 | 97(64%)             | 4.6  | 2.4            | 8.8            | <.0001 <sup>1</sup> |
| Milk                | 50  | 34(68%)             | 7.4  | 2.5            | 21.4           | <0.01 <sup>1</sup>  |
| Egg                 | 49  | 36(73%)             | 13.6 | 4.6            | 40.3           | <.0001 <sup>1</sup> |
| Peanut              | 94  | 64(68%)             | 5.6  | 2.3            | 13.6           | <0.01 <sup>1</sup>  |
| Soy                 | 11  | 9(82%)              | 17.8 | 3.6            | 87.9           | <.0001 <sup>2</sup> |
| Wheat               | 6   | 5(83%)              | 19.8 | 2.2            | 177.4          | <0.01 <sup>2</sup>  |
| Fish                | 5   | 5(100%)             | —    | —              | —              | <0.01 <sup>2</sup>  |
| Shellfish           | 10  | 7(70%)              | 9.2  | 2.2            | 38.4           | <0.01 <sup>2</sup>  |
| Sesame              | 12  | 7(58%)              | 5.5  | 1.6            | 19.0           | <0.01 <sup>2</sup>  |
| Walnut              | 30  | 20(67%)             | 9.2  | 2.6            | 32.8           | <0.01 <sup>1</sup>  |

<sup>1</sup>Adjusted for age, gender, ethnicity (white vs non-white), intrafamilial correlation, family history of asthma, and aeroallergen sensitization

<sup>2</sup>Unadjusted

Table E2A. Relationship between skin test positivity to food allergens and asthma in children  $\geq 6$  years old with asymptomatic sensitization\*

| Positive skin test (MWD $\geq 3$ mm) | N  | Asthma Diagnosis | OR  | 95% CI      |             | p     |
|--------------------------------------|----|------------------|-----|-------------|-------------|-------|
|                                      |    | Yes              |     | Lower bound | Upper bound |       |
| Any Food Allergen                    | 45 | 13(29%)          | 1.8 | 0.8         | 4.0         | 0.16  |
| Milk                                 | 2  | 1(50%)           | 4.4 | 0.3         | 72.5        | 0.35† |
| Egg                                  | 0  | 0(0%)            | —   | —           | —           | —     |
| Peanut                               | 21 | 8(38%)           | 2.7 | 1.0         | 7.3         | 0.05  |
| Soy                                  | 20 | 5(25%)           | 1.5 | 0.5         | 4.5         | 0.51  |
| Wheat                                | 2  | 1(50%)           | 4.4 | 0.3         | 72.5        | 0.35† |
| Fish                                 | 2  | 0(0%)            | —   | —           | —           | —     |
| Shellfish                            | 14 | 5(36%)           | 2.4 | 0.7         | 8.0         | 0.14  |
| Sesame                               | 15 | 4(27%)           | 1.6 | 0.5         | 5.5         | 0.49† |
| Walnut                               | 14 | 5(36%)           | 2.4 | 0.7         | 8.0         | 0.14  |

\*Unadjusted

† Fischer's exact test used due to number of observations, all others use Chi square as test statistic.

Table E2B. Relationship between detectable levels of specific IgE to food allergens and asthma in children  $\geq 6$  years old with asymptomatic sensitization

| Detectable specific IgE | N   | Asthma Diagnosis | OR  | 95% CI      |             | p                 |
|-------------------------|-----|------------------|-----|-------------|-------------|-------------------|
|                         |     | Yes              |     | Lower bound | Upper bound |                   |
| Any Food Allergen       | 146 | 43(29%)          | 1.5 | 0.8         | 2.8         | 0.17 <sup>1</sup> |
| Milk                    | 67  | 17(25%)          | 1.2 | 0.6         | 2.6         | 0.56 <sup>2</sup> |
| Egg                     | 58  | 18(31%)          | 1.6 | 0.8         | 3.5         | 0.19 <sup>2</sup> |
| Peanut                  | 49  | 16(33%)          | 1.8 | 0.8         | 3.8         | 0.15 <sup>2</sup> |
| Soy                     | 45  | 17(38%)          | 2.2 | 1.0         | 4.8         | 0.04 <sup>2</sup> |
| Wheat                   | 89  | 21(24%)          | 1.1 | 0.6         | 2.3         | 0.74 <sup>2</sup> |
| Fish                    | 3   | 2(67%)           | 7.3 | 0.6         | 84.7        | 0.13 <sup>2</sup> |
| Shellfish               | 33  | 10(30%)          | 1.6 | 0.7         | 3.9         | 0.31 <sup>2</sup> |
| Sesame                  | 81  | 22(27%)          | 1.4 | 0.7         | 2.7         | 0.38 <sup>2</sup> |
| Walnut                  | 34  | 12(35%)          | 2.0 | 0.8         | 4.7         | 0.11 <sup>2</sup> |

<sup>1</sup>Adjusted for age, gender, ethnicity (white vs non-white), intrafamilial correlation, family history of asthma, and aeroallergen sensitization.

<sup>2</sup>Unadjusted

Table E3. Severity of food allergy and asthma prevalence in Children  $\geq$  6 years (Total subjects=271)

| Food Allergen | Severity   | N   | Asthma Diagnosis |      | OR   | 95% CI      |             | p                   | p-trend* |
|---------------|------------|-----|------------------|------|------|-------------|-------------|---------------------|----------|
|               |            |     | N                | %    |      | Lower bound | Upper bound |                     |          |
| Milk          | None       | 119 | 24               | 20%  | 1    | —           | —           | —                   | <0.0001  |
|               | Non-severe | 8   | 5                | 62%  | 6.9  | 1.1         | 44.5        | 0.041               |          |
|               | Severe     | 42  | 29               | 69%  | 7.5  | 2.4         | 23.3        | <0.01 <sup>1</sup>  |          |
| Egg           | None       | 119 | 24               | 20%  | 1    | —           | —           | —                   | <0.0001  |
|               | Non-severe | 21  | 15               | 71%  | 12   | 3.1         | 46.2        | <0.01 <sup>1</sup>  |          |
|               | Severe     | 28  | 21               | 75%  | 15.3 | 4.2         | 55.6        | <.0001 <sup>1</sup> |          |
| Peanut        | None       | 119 | 24               | 20%  | 1    | —           | —           | —                   | <0.0001  |
|               | Non-severe | 34  | 22               | 65%  | 5    | 1.6         | 15.3        | <0.01 <sup>1</sup>  |          |
|               | Severe     | 60  | 42               | 70%  | 6    | 2.3         | 15.6        | <0.01 <sup>1</sup>  |          |
| Soy           | None       | 119 | 24               | 20%  | 1    | —           | —           | —                   | <0.0001  |
|               | Non-severe | 2   | 1                | 50%  | 4.3  | 0.7         | 107.5       | 0.372               |          |
|               | Severe     | 9   | 8                | 89%  | 35.6 | 3.7         | 346.4       | <0.01 <sup>2</sup>  |          |
| Wheat         | None       | 119 | 24               | 20%  | 1    | —           | —           | —                   | 0.0025   |
|               | Non-severe | 1   | 1                | 100% | —    | —           | —           | 0.212               |          |
|               | Severe     | 5   | 4                | 80%  | 15.8 | 1.7         | 148.2       | <0.01 <sup>2</sup>  |          |
| Fish          | None       | 119 | 24               | 20%  | 1    | —           | —           | —                   | <0.0001  |
|               | Non-severe | 3   | 3                | 100% | —    | —           | —           | 0.012               |          |
|               | Severe     | 2   | 2                | 100% | —    | —           | —           | 0.042               |          |
| Shellfish     | None       | 119 | 24               | 20%  | 1    | —           | —           | —                   | 0.002    |
|               | Non-severe | 6   | 4                | 67%  | 6.9  | 0.8         | 54.1        | 0.072               |          |
|               | Severe     | 4   | 3                | 75%  | 14.8 | 1.1         | 200         | 0.042               |          |
| Sesame        | None       | 119 | 24               | 20%  | 1    | —           | —           | —                   | 0.0053   |
|               | Non-severe | 6   | 3                | 50%  | 4.3  | 0.4         | 28.7        | 0.132               |          |
|               | Severe     | 6   | 4                | 67%  | 8.9  | 1.3         | 65.3        | 0.032               |          |
| Walnut        | None       | 119 | 24               | 20%  | 1    | —           | —           | —                   | <0.0001  |
|               | Non-severe | 10  | 6                | 60%  | 6.6  | 1.4         | 30          | 0.022               |          |
|               | Severe     | 20  | 14               | 70%  | 10.1 | 3.1         | 33.2        | <0.01 <sup>2</sup>  |          |

<sup>1</sup>Adjusted for age, gender, ethnicity (white vs non-white), intrafamilial correlations, family history of asthma, and aeroallergen sensitization.

<sup>2</sup>Unadjusted

\*Cochran-Armitage Test for Trend (Exact Test)
