# Supplementary material
Source: PubMed Central journal article supplement (PMC2922978)
Supplement: NIHMS126021-supplement-Supp_Data_02.pdf [file NIHMS126021-supplement-Supp_Data_02.pdf]

# CMH Food Allergy Baseline Interview Questionnaire

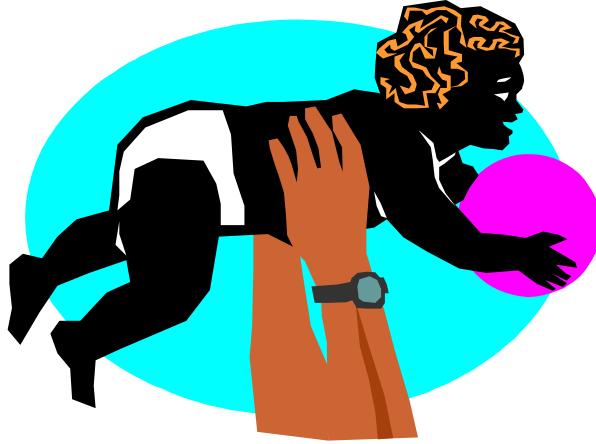

Today's date   /   /

Interviewer's Name

Interview is  Complete  Incomplete

Location of Interview

If incomplete date of future visit   /   /

**Family ID**

Type of Questionnaire

B

**SCREENING: For Interviewers:**

I. Eligibility

Are you this child's biological parent?     Yes     No

Are you this child's legal guardian?     Yes     No

If no to any of the above, thank participant for his/her time. Enrollment is accepted from biological mother or father only if he/she remains legal guardian of child.

**If not parent and legal guardian of child:**

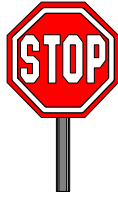

---

II. Explain study purpose and procedures and obtain informed consent.  
Introduction and instructions to interviewer (to be read to patient).

Everyone who participates in this study will be asked a series of questions. The questions should take about 30 minutes to answer. You may skip any question you feel uncomfortable answering. I'd like to assure you that this information is confidential and will be used solely for research purposes.

Section I: Family Pedigree (Interviewers: fill in the information for each family member, filling in the circles for all health conditions that apply)

Mom- First Initial  DOB  /  /  Gender (F,M)

- Food Allergy  Eczema  Asthma  Hay Fever  Drug Allergy  Other Allergies

Dad- First Initial  DOB  /  /  Gender (F,M)

- Food Allergy  Eczema  Asthma  Hay Fever  Drug Allergy  Other Allergies

Index Child- First Initial  DOB  /  /  Gender (F,M)

- Food Allergy  Eczema  Asthma  Hay Fever  Drug Allergy  Other Allergies

Sibling 1- First Initial  DOB  /  /  Gender (F,M)

- Food Allergy  Eczema  Asthma  Hay Fever  Drug Allergy  Other Allergies

Sibling 2- First Initial  DOB  /  /  Gender (F,M)

- Food Allergy  Eczema  Asthma  Hay Fever  Drug Allergy  Other Allergies

Sibling 3- First Initial  DOB  /  /  Gender (F,M)

- Food Allergy  Eczema  Asthma  Hay Fever  Drug Allergy  Other Allergies

Sibling 4- First Initial  DOB  /  /  Gender (F,M)

- Food Allergy  Eczema  Asthma  Hay Fever  Drug Allergy  Other Allergies

Sibling 5- First Initial  DOB  /  /  Gender (F,M)

- Food Allergy  Eczema  Asthma  Hay Fever  Drug Allergy  Other Allergies

Sibling 6- First Initial  DOB  /  /  Gender (F,M)

- Food Allergy  Eczema  Asthma  Hay Fever  Drug Allergy  Other Allergies

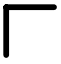

3326099406

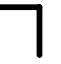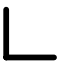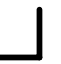





1103099407



I

For interviewers to read aloud: THESE NEXT QUESTIONS ARE ABOUT YOUR CHILD'S HEALTH DURING HIS/HER FIRST YEAR OF LIFE, OR SINCE BIRTH IF UNDER 1 YEAR OLD.

1. How much did your child weigh at birth?   lbs   oz     grams

2. Was your child born   weeks   days before due date  
 Before the due date?  
 At the due date?  
 After the due date?   weeks   days after due date

3. Was your child born by C-section?  Yes  No

4. Since birth or up until your child reached one year of age, has your child ever had any of the following illnesses? (DURING THE FIRST YEAR OF LIFE ONLY)

Common Cold  Yes  No  Not Sure

If yes, how many times?   X's

Gastric / intestinal infection  Yes  No  Not Sure

If yes, how many times?   X's

Conjunctivitis / Pink Eye  Yes  No  Not Sure

If yes, how many times?   X's

RSV / Bronchiolitis  Yes  No  Not Sure

If yes, hospitalized?  Yes  No  Not Sure

Bronchitis  Yes  No  Not Sure

5. Antibiotics are medicines that your doctor prescribes for illnesses caused by infections; examples of some names of commonly prescribed antibiotics are amoxicillin and penicillin. During the first year of life (or since birth IF THE CHILD IS UNDER 1 YEAR OLD), did your child take any antibiotics?

Yes  No  Not Sure

If NO skip to question 7

If yes, how many times was your child prescribed an antibiotic medicine since birth (IF UNDER 1 YEAR OLD) or in the FIRST YEAR OF LIFE?

X's

6. Since birth or up until your child reached one year of age, has your child ever had any of the following illnesses? (DURING THE FIRST YEAR OF LIFE ONLY)

Ear infection  Yes  No  Not Sure

If yes, how many times?   X's

Pneumonia  Yes  No  Not Sure

If yes, how many times?   X's

Skin infection  Yes  No  Not Sure

If yes, how many times?   X's

Urinary tract infection  Yes  No  Not Sure

If yes, how many times?   X's

Parasite infection  Yes  No  Not Sure

Bone infection (Osteomyelitis)  Yes  No  Not Sure

Meningitis  Yes  No  Not Sure

Bacteremia / Sepsis (blood infection)  Yes  No  Not Sure

Sinus infection  Yes  No  Not Sure

7. During the first year of life (or since birth IF THE CHILD IS UNDER 1 YEARS OLD), did your child ever live in a farming environment?

Yes  No





#3 From  years  months to...

years  months

# of hours/week  # of other children in child's classroom

B. Home-based child care? #1 From  years  months to...  
(not in own home)

years  months

# of hours/week  # of other children

#2 From  years  months to...

years  months

# of hours/week  # of other children

C. In home care (own home, nanny)? From  years  months to...

years  months

# of hours/week  # of other children

11. Did you breast feed or bottle feed your child, or both?

Breast only  Bottle only  Both

12. For how long did you exclusively breast feed (no formula or food)?

months  weeks

13. For how long did you breast feed (with or without the use of formula)?

months  weeks

14. During breast feeding, did you take medications for gastrointestinal upset?

- Yes  No  Not Sure

if YES, which of the following medications did you take?

- Antacids (Mylanta, Rolaid, TUMS, Pepto-Bismol)
- H2 Blockers (Pepcid AC, Zantac)
- Proton Pump inhibitors (Aciphex, Prilosec, Prevacid, Nexium)
- Prokinetic agents (Urecholine, Reglan, Erythromycin)
- Not sure
- Other, specify 

|  |  |  |  |  |  |  |  |  |  |  |  |  |  |  |  |  |  |  |  |
|--|--|--|--|--|--|--|--|--|--|--|--|--|--|--|--|--|--|--|--|
|  |  |  |  |  |  |  |  |  |  |  |  |  |  |  |  |  |  |  |  |
|--|--|--|--|--|--|--|--|--|--|--|--|--|--|--|--|--|--|--|--|

15. During pregnancy, did you take medications for gastrointestinal upset?

- Yes  No  Not Sure

if YES, which of the following medications did you take?

- Antacids (Mylanta, Rolaid, TUMS, Pepto-Bismol)
- H2 Blockers (Pepcid AC, Zantac)
- Proton Pump inhibitors (Aciphex, Prilosec, Prevacid, Nexium)
- Prokinetic agents (Urecholine, Reglan, Erythromycin)
- Not sure
- Other, specify 

|  |  |  |  |  |  |  |  |  |  |  |  |  |  |  |  |  |  |  |  |
|--|--|--|--|--|--|--|--|--|--|--|--|--|--|--|--|--|--|--|--|
|  |  |  |  |  |  |  |  |  |  |  |  |  |  |  |  |  |  |  |  |
|--|--|--|--|--|--|--|--|--|--|--|--|--|--|--|--|--|--|--|--|

16. At what age did you introduce the following formula/milk to your child?

Cow's milk formula (Enfamil, Similac)  Never  Not Sure  

|  |  |
|--|--|
|  |  |
|--|--|

 Year 

|  |  |
|--|--|
|  |  |
|--|--|

 month 

|  |  |
|--|--|
|  |  |
|--|--|

 days

Whey Hydrolyzed formula (Goodstart)  Never  Not Sure  

|  |  |
|--|--|
|  |  |
|--|--|

 Year 

|  |  |
|--|--|
|  |  |
|--|--|

 month 

|  |  |
|--|--|
|  |  |
|--|--|

 days

Casein Hydrolysate formula (Nutramigen, Pregestimil, Alimentum)  Never  Not Sure  

|  |  |
|--|--|
|  |  |
|--|--|

 Year 

|  |  |
|--|--|
|  |  |
|--|--|

 month 

|  |  |
|--|--|
|  |  |
|--|--|

 days

Elemental formula (Neocate, Elecare, EO28)  Never  Not Sure  

|  |  |
|--|--|
|  |  |
|--|--|

 Year 

|  |  |
|--|--|
|  |  |
|--|--|

 month 

|  |  |
|--|--|
|  |  |
|--|--|

 days

Whole Cow's Milk  Never  Not Sure  

|  |  |
|--|--|
|  |  |
|--|--|

 Year 

|  |  |
|--|--|
|  |  |
|--|--|

 month 

|  |  |
|--|--|
|  |  |
|--|--|

 days

Soy formula  
(Isomil, Prosobee, Alsoy)

Never  Not Sure

At   Year   month   days

Soy Milk

Never  Not Sure

At   Year   month   days

17. Is your child **younger** than **7 years old**?  Yes  No

If NO skip to question 21

18. In a typical week during a period of breast feeding, how often did you (**THE MOTHER**) eat the following foods?

**Cow's Milk/Dairy Products/ Cheese**

Initially:  None  <1 day  1-2 days  3-5 days  6-7 days

Changed diet when child was:   years   months

New frequency:  None  <1 day  1-2 days  3-5 days  6-7 days

---

**Egg**

Initially:  None  <1 day  1-2 days  3-5 days  6-7 days

Changed diet when child was:   years   months

New frequency:  None  <1 day  1-2 days  3-5 days  6-7 days

---

**Peanut (including peanut butter)**

Initially:  None  <1 day  1-2 days  3-5 days  6-7 days

Changed diet when child was:   years   months

New frequency:  None  <1 day  1-2 days  3-5 days  6-7 days

---

**Tree nuts (i.e. almond, cashew, filbert/hazel, walnut, brazil, macadamia, pecan, pine, pistachio)**

Initially:  None  <1 day  1-2 days  3-5 days  6-7 days

Changed diet when child was:   years   months

New frequency:  None  <1 day  1-2 days  3-5 days  6-7 days

---

**Fish (i.e. salmon, tuna, catfish, cod, flounder, halibut, trout, bass)**

Initially:  None  <1 day  1-2 days  3-5 days  6-7 days

Changed diet when child was:   years   months

New frequency:  None  <1 day  1-2 days  3-5 days  6-7 days

---

**Shellfish (i.e., shrimp, crab, lobster, clam, oyster, mussels)**

Initially:  None  <1 day  1-2 days  3-5 days  6-7 days

Changed diet when child was:   years   months

New frequency:  None  <1 day  1-2 days  3-5 days  6-7 days

---

8289099409

**Wheat (i.e., pasta, bread, cereal)**

Initially:  None  <1 day  1-2 days  3-5 days  6-7 days

Changed diet when child was:   years   months

New frequency:  None  <1 day  1-2 days  3-5 days  6-7 days

---

**Soy/Tofu**

Initially:  None  <1 day  1-2 days  3-5 days  6-7 days

Changed diet when child was:   years   months

New frequency:  None  <1 day  1-2 days  3-5 days  6-7 days

---

**Seeds (i.e. sesame, sunflower, pumpkin)**

Initially:  None  <1 day  1-2 days  3-5 days  6-7 days

Changed diet when child was:   years   months

New frequency:  None  <1 day  1-2 days  3-5 days  6-7 days

---

**Green vegetables**

Initially:  None  <1 day  1-2 days  3-5 days  6-7 days

Changed diet when child was:   years   months

New frequency:  None  <1 day  1-2 days  3-5 days  6-7 days

---

**Orange vegetables (carrots, squash, etc.)**

Initially:  None  <1 day  1-2 days  3-5 days  6-7 days

Changed diet when child was:   years   months

New frequency:  None  <1 day  1-2 days  3-5 days  6-7 days

---

**Fruits**

Initially:  None  <1 day  1-2 days  3-5 days  6-7 days

Changed diet when child was:   years   months

New frequency:  None  <1 day  1-2 days  3-5 days  6-7 days

---

**Meats (beef, poultry, pork)**

Initially:  None  <1 day  1-2 days  3-5 days  6-7 days

Changed diet when child was:   years   months

New frequency:  None  <1 day  1-2 days  3-5 days  6-7 days

---

**Beans**

Initially:  None  <1 day  1-2 days  3-5 days  6-7 days

Changed diet when child was:   years   months

New frequency:  None  <1 day  1-2 days  3-5 days  6-7 days

---

**Rice**Initially:  None  <1 day  1-2 days  3-5 days  6-7 daysChanged diet when child was:   years   monthsNew frequency:  None  <1 day  1-2 days  3-5 days  6-7 days

19. At what age did you first introduce solid food to your child?

 Never  Not SureAt   Year   month   days

20. At what age did you first introduce the following foods to your child?

Cow's milk/Dairy Products/ Cheese  Never  Not sure  Year   Month

Egg

 Never  Not Sure  Year   month   days

Peanut (incl. peanut butter)

 Never  Not Sure  Year   month   days

Tree Nuts (i.e. almond, cashew, filbert/hazel, walnut, brazil, macadamia, pecan, pine, pistachio)

 Never  Not Sure  Year   month   days

Fish (i.e. tuna, salmon, cod, flounder, catfish, halibut, trout, bass)

 Never  Not Sure  Year   month   days

Shellfish (i.e. shrimp, crab, lobster, clam, oyster, mussels)

 Never  Not Sure  Year   month   days

Wheat (i.e. pasta, bread, cereal)

Never  Not Sure

At   Year   month   days

Soy/Tofu

Never  Not Sure

At   Year   month   days

Seeds (i.e. sesame, sunflower, pumpkin)

Never  Not Sure

At   Year   month   days

Jar Vegetables (baby food)

Never  Not Sure

At   Year   month   days

Green Vegetables

Never  Not Sure

At   Year   month   days

Orange Vegetables

Never  Not Sure

At   Year   month   days

Fruit Juice

Never  Not Sure

At   Year   month   days

Jar Fruits (baby food)

Never  Not Sure

At   Year   month   days

Fresh Fruits

Never  Not Sure

At   Year   month   days

Meat

Never  Not Sure

At   Year   month   days

Rice Cereal

Never  Not Sure

At 

|  |  |
|--|--|
|  |  |
|--|--|

 Year 

|  |  |
|--|--|
|  |  |
|--|--|

 month 

|  |  |
|--|--|
|  |  |
|--|--|

 days

21. At present, does your child take any nutritional supplements or vitamins?  
 Yes  No **If NO skip to question 27**

22. On average how many days per week does your child take a multivitamin/polyvisol?  
 None  1-2 days  3-4 days  5-6 days  everyday

a) Is the multivitamin infused with iron?

Yes  No  Not Sure

b) Is the multivitamin infused with calcium?

Yes  No  Not Sure

23. On average how many days per week does your child take Trivisol (Vitamins A,C,D)?  
 None  1-2 days  3-4 days  5-6 days  everyday

24. On average how many days per week does your child take a Calcium supplement?  
 None  1-2 days  3-4 days  5-6 days  everyday

25. On average how many days per week does your child take Pediasure/Ensure?  
 None  1-2 days  3-4 days  5-6 days  everyday

26. Other (specify): 

|  |  |  |  |  |  |  |  |  |  |  |  |  |  |  |  |  |  |  |  |
|--|--|--|--|--|--|--|--|--|--|--|--|--|--|--|--|--|--|--|--|
|  |  |  |  |  |  |  |  |  |  |  |  |  |  |  |  |  |  |  |  |
|--|--|--|--|--|--|--|--|--|--|--|--|--|--|--|--|--|--|--|--|

None  1-2 days  3-4 days  5-6 days  everyday

Other (specify): 

|  |  |  |  |  |  |  |  |  |  |  |  |  |  |  |  |  |  |  |  |
|--|--|--|--|--|--|--|--|--|--|--|--|--|--|--|--|--|--|--|--|
|  |  |  |  |  |  |  |  |  |  |  |  |  |  |  |  |  |  |  |  |
|--|--|--|--|--|--|--|--|--|--|--|--|--|--|--|--|--|--|--|--|

None  1-2 days  3-4 days  5-6 days  everyday

27. At present, how often does your child eat the following foods per week?

Cow's milk/Dairy Products/Cheese

None  <1 day  1-2 days  3-5 days  6-7 days

Egg

None  <1 day  1-2 days  3-5 days  6-7 days

Peanut(including peanut butter)

None  <1 day  1-2 days  3-5 days  6-7 days

Tree Nuts (i.e. almond,cashew,filbert/hazel,walnut,brazil,macadamia,pecan,pine pistachio)

None  <1 day  1-2 days  3-5 days  6-7 days

Fish (i.e. tuna, salmon, cod, flounder, catfish, halibut, trout, bass)

None  <1 day  1-2 days  3-5 days  6-7 days



Shellfish (i.e. Shrimp, crab, lobster, clam, oyster, mussels)

None  <1 day  1-2 days  3-5 days  6-7 days

Wheat (i.e. pasta, bread, cereal)

None  <1 day  1-2 days  3-5 days  6-7 days

Soy/Tofu

None  <1 day  1-2 days  3-5 days  6-7 days

Seeds (i.e. sesame, sunflower, pumpkin)

None  <1 day  1-2 days  3-5 days  6-7 days

Green Vegetables

None  <1 day  1-2 days  3-5 days  6-7 days

Orange Vegetables (carrots, squash, etc)

None  <1 day  1-2 days  3-5 days  6-7 days

Fruits

None  <1 day  1-2 days  3-5 days  6-7 days

Fruit juice (without calcium)  None  <1 day  1-2 days  3-5 days  6-7 days

Calcium fortified fruit juice  None  <1 day  1-2 days  3-5 days  6-7 days

Meat

None  <1 day  1-2 days  3-5 days  6-7 days

Beans

None  <1 day  1-2 days  3-5 days  6-7 days

Rice

None  <1 day  1-2 days  3-5 days  6-7 days

28. Does your child have Eczema?

No

Yes, only when he/she was a baby, but outgrew by age   Year(s)   Months

Yes, he/she has it now

If **YES**, was your child's eczema diagnosed by a doctor?  Yes  No

How old was your child when first diagnosed by a doctor?

Year(s)   Months   Weeks

29. Have you ever used a cream, lotion, or ointment containing steroids on your child's skin; for example: hydrocortisone cream or triamcinolone cream?

Yes  No

30. Has your child ever had asthma?

No

Yes, only when she/he was a baby, but outgrew by age   Year(s)   Months

Yes, he/she has it now

If **YES**, was your child's asthma diagnosed by a doctor?  Yes  No

How old was your child when first diagnosed by a doctor?

Year(s)   Months

31. Has your child ever used an inhaler or nebulizer?  Yes  No

32. Has your child ever had hay fever or seasonal allergies?

No

Yes, only when she/he was a baby, but outgrew by age   Year(s)   Months

Yes, he/she has it now

If **YES**, was your child's hay fever diagnosed by a doctor?  Yes  No

How old was your child when first diagnosed by a doctor?

Year(s)   Months

During which season does he/she have seasonal allergies?

Spring  Summer  Autumn  Winter  Year round

33. Has your child ever had pet allergies?  Yes  No

**If NO skip to question 34**

Has your child ever had a **cat** allergy?

No

Yes, only when she/he was a baby, but outgrew by age   Year(s)   Months

Yes, he/she has it now

If **YES**, was your child's cat allergy diagnosed by a doctor?  Yes  No

How old was your child when first diagnosed by a doctor?

Year(s)   Months

Has your child ever had a **dog** allergy?

No

Yes, only when she/he was a baby, but outgrew by age   Year(s)   Months

Yes, he/she has it now

If **YES**, was your child's dog allergy diagnosed by a doctor?  Yes  No

How old was your child when first diagnosed by a doctor?   Year(s)   Months

Has your child ever had any **other** pet allergies?  Yes  No **If No, skip to 34**

Other pet allergy #1, specify:

Yes, only when she/he was a baby, but outgrew by age   Year(s)   Months

Yes, she/he has it now

If **YES**, was your child's allergy diagnosed by a doctor?  Yes  No

How old was your child when first diagnosed by a doctor?

Year(s)   Months

Other pet allergy #2, Specify:

Yes, only when she/he was a baby, but outgrew by age  Year(s)  Months

Yes, she/he has it now

If **YES**, was your child's allergy diagnosed by a doctor?  Yes  No

How old was your child when first diagnosed by a doctor?  Year(s)  Months

34. Does your child have any of the following environmental allergies that have been diagnosed by your doctor?

- Pollen
- Dust Mite
- Cockroach
- Mold
- Other
- None

Specify

Specify

Specify

35. Has your child ever used anti-allergy medications? (i.e., Benadryl, Zyrtec, Claritin, Atarax)

- Yes
- No

36. Has your child ever used medications for gastrointestinal upset?

- Yes
- No

If YES, which medications has he/she taken?

- Antacids (Mylanta, Roloids, TUMS, Pepto-Bismol)
- H2 Blockers (Pepcid AC, Zantac)
- Proton Pump inhibitors (Aciphex, Prilosec, Prevacid, Nexium)
- Prokinetic agents (Urecholine, Reglan, Erythromycin)
- Not sure
- Other, specify

37. Does your child have any drug allergies?

- Yes
- No

Specify drug:

Was this drug allergy diagnosed by a doctor?  Yes  No

How old was your child when first diagnosed by a doctor?  Year(s)  Months

Specify drug:

|  |  |  |  |  |  |  |  |  |  |  |  |  |  |  |  |  |  |  |  |
|--|--|--|--|--|--|--|--|--|--|--|--|--|--|--|--|--|--|--|--|
|  |  |  |  |  |  |  |  |  |  |  |  |  |  |  |  |  |  |  |  |
|--|--|--|--|--|--|--|--|--|--|--|--|--|--|--|--|--|--|--|--|

Was this drug allergy diagnosed by a doctor?  Yes  NoHow old was your child when first diagnosed by a doctor?   Year(s)   Months

Specify drug:

|  |  |  |  |  |  |  |  |  |  |  |  |  |  |  |  |  |  |  |  |
|--|--|--|--|--|--|--|--|--|--|--|--|--|--|--|--|--|--|--|--|
|  |  |  |  |  |  |  |  |  |  |  |  |  |  |  |  |  |  |  |  |
|--|--|--|--|--|--|--|--|--|--|--|--|--|--|--|--|--|--|--|--|

Was this drug allergy diagnosed by a doctor?  Yes  NoHow old was your child when first diagnosed by a doctor?   Year(s)   Months38. Has your child been diagnosed with G6PD deficiency?  Yes  No

39. Is your child allergic to insect stings? (for example bee, wasp, yellow jacket. Mosquitoes and spiders don't count)

 Yes  No  Don't know/Never been stungIf **Yes**, is it a severe allergy (that is, difficulty breathing, need epi pen or to go to the hospital)? Yes  No40. Is your child allergic to any food(s) at present?  Yes  No41. Has your child ever been allergic to any foods in the past that they have since outgrown?  Yes  No**If NO to question 40 AND 41, skip to Pediatric Sleep Questionnaire (question A1)****Dairy products/ Cheese/ Milk**  Current  Outgrown  NeverIf Current/Outgrown, how old was your child when you first noticed his/her food allergy?   years   monthsIf Outgrown, at what age?   years   months**Egg** Current  Outgrown  NeverIf Current/Outgrown, how old was your child when you first noticed his/her food allergy?   years   monthsIf Outgrown, at what age?   years   months**Peanuts**  Current  Outgrown  NeverIf Current/Outgrown, how old was your child when you first noticed his/her food allergy?   years   monthsIf Outgrown, at what age?   years   months





Other Foods (specify)

[Grid of 14 empty boxes for food name]

Current  Outgrown

How old was your child when you first noticed his/her food allergy?

[ ] [ ] years [ ] [ ] months

If Outgrown, at what age?

[ ] [ ] years [ ] [ ] months

[Grid of 14 empty boxes for food name]

Current  Outgrown

How old was your child when you first noticed his/her food allergy?

[ ] [ ] years [ ] [ ] months

If Outgrown, at what age?

[ ] [ ] years [ ] [ ] months

[Grid of 14 empty boxes for food name]

Current  Outgrown

How old was your child when you first noticed his/her food allergy?

[ ] [ ] years [ ] [ ] months

If Outgrown, at what age?

[ ] [ ] years [ ] [ ] months

[Grid of 14 empty boxes for food name]

Current  Outgrown

How old was your child when you first noticed his/her food allergy?

[ ] [ ] years [ ] [ ] months

If Outgrown, at what age?

[ ] [ ] years [ ] [ ] months

[Grid of 14 empty boxes for food name]

Current  Outgrown

How old was your child when you first noticed his/her food allergy?

[ ] [ ] years [ ] [ ] months

If Outgrown, at what age?

[ ] [ ] years [ ] [ ] months

[Grid of 14 empty boxes for food name]

Current  Outgrown

How old was your child when you first noticed his/her food allergy?

[ ] [ ] years [ ] [ ] months

If Outgrown, at what age?

[ ] [ ] years [ ] [ ] months















## Pediatric Sleep Questionnaire

Please answer the following questions regarding the behavior of your child during sleep and wakefulness. The questions apply to how your child acts in general, not necessarily during the past few days. When you see the word "usually" it means "more than half the time" or "on more than half the nights."

### A. Nighttime and sleep behavior

A1. While sleeping, does your child ever snore?

Yes  No  Don't know **If NO skip to question A5**

A2. Does your child snore more than half the time (half the time he/she sleeps)?

Yes  No  Don't Know

A3. Does your child always snore?

Yes  No  Don't Know

A4. Does your child snore loudly?

Yes  No  Don't Know

A5. While sleeping, does your child have "heavy" or loud breathing?

Yes  No  Don't Know

A6. While sleeping, does your child have trouble breathing or struggle to breathe?

Yes  No  Don't Know

A7. Have you ever seen your child stop breathing during the night?

Yes  No  Don't Know

If so, please describe what happened:

---



---

A8. Have you ever been concerned about your child's breathing during the night?

Yes  No  Don't Know

A9. Have you ever had to shake your sleeping child to get him or her to breathe or wake up and breathe?

Yes  No  Don't know

A11. Have you ever seen your child wake up with a snorting sound?

Yes  No  Don't Know

A12. Does your child have restless sleep?

Yes  No  Don't Know

A13. Does your child describe restlessness of the legs when in bed?

Yes  No  Don't Know

A13a. Does your child have "growing pains" (unexplained leg pains)?

Yes  No  Don't Know

A13b. Does your child have growing pains that are worst in bed?

Yes  No  Don't Know

A14. While your child sleeps, have you seen brief kicks of one leg or both legs?

Yes  No  Don't Know

A14a. While your child sleeps, have you seen repeated kicks or jerks of the legs at regular intervals (i.e., about every 20 to 40 seconds)?

Yes  No  Don't Know

A15. At night, does your child usually become sweaty, or do the pajamas usually become wet with perspiration?

Yes  No  Don't know

A16. At night does your child usually get out of bed (for any reason)?

Yes  No  Don't Know

A17. At night, does your child get out of bed to urinate?

Yes  No  Don't Know

A17a. If yes, how many times each night, on average?

A21. Does your child usually sleep with the mouth open?  Yes  No  Don't Know

A22. Is your child's nose usually congested or "stuffed" at night?

Yes  No  Don't Know

A23. Do any allergies affect your child's ability to breathe through the nose?

Yes  No  Don't Know

A24. Does your child tend to breathe through the mouth during the day?

Yes  No  Don't Know

A25. Does your child have a dry mouth upon waking up in the morning?

Yes  No  Don't Know

A27. Does your child complain of an upset stomach at night?

Yes  No  Don't Know

A29. Does your child get a burning feeling in the throat at night?

Yes  No  Don't Know

A30. Does your child grind his or her teeth at night?  Yes  No  Don't Know

A32. Does your child occasionally wet the bed?  Yes  No  Don't Know

A33. Has your child ever walked during sleep ("sleep walking")?

Yes  No  Don't Know

A34. Have you ever heard your child talk during sleep ("sleep talking")?

Yes  No  Don't Know

A35. Does your child have nightmares or awaken at night afraid or appearing tearful once a week or more on average?

Yes  No  Don't know

A35a. If yes, after awakening from one of these episodes, can your child tell you about the dream?

Yes  No  Don't know

A36. Has your child ever woken up screaming during the night?  Yes  No  Don't Know

A37. Has your child ever moved or behaved at night in a way that made you think your child was neither completely awake nor asleep?

Yes  No  Don't know

If so, please describe what happened:

---



---

A40. Does your child have difficulty falling asleep at night?  Yes  No  Don't Know

A41. How long does it take your child to fall asleep at night?   hrs.   min

A42. At bedtime does your child usually have difficult "routines" or "rituals," argue a lot, or otherwise behave badly?  Yes  No  Don't know

A43. Does your child bang his/her head or rock his/her body when going to sleep?  
 Yes  No  Don't Know

A44. Does your child wake up more than twice a night on average?  
 Yes  No  Don't Know

A45. Does your child have trouble falling back asleep if he or she wakes up at night?  
 Yes  No  Don't Know

A46. Does your child wake up early in the morning and have difficulty going back to sleep?  Yes  No  Don't know

A47. Does the time at which your child goes to bed change a lot from day to day?  
 Yes  No  Don't Know

A48. Does the time at which your child gets up from bed change a lot from day to day?  
 Yes  No  Don't Know

A49. What time does your child usually go to bed (fall asleep) during the week?

  :  

A50. What time does your child usually go to bed (fall asleep) on the weekend or vacation?

  :  

A51. What time does your child usually get out of bed (wake up) on weekday mornings?

  :  

A52. What time does your child usually get out of bed (wake up) on weekend or vacation mornings?

  :  

A53. How many hours of sleep does your child usually get on school nights?

  hr(s)   min

A54. How many hours of sleep does your child usually get on non-school nights?

  hr(s)   min

**B. Daytime behavior and other possible problems:**

B1. Does your child wake up feeling unrefreshed in the morning?  Yes  No  Don't Know

B2. Does your child have a problem with sleepiness during the day?  Yes  No  Don't Know

B3. Does your child complain that he or she feels sleepy during the day?

Yes  No  Don't Know

B4. Has a teacher or other supervisor commented that your child appears sleepy during the day?  
 Yes  No  Don't know

B5. Does your child usually nap during the day?  Yes  No  Don't Know

B5a. If no, during a usual week, how many times does this child take a nap for 5 minutes or more? (Write in "0" if he/she does not take any naps.)

  naps/week

B6. Is it hard to wake your child up in the morning?  Yes  No  Don't Know



B7. Does your child wake up with headaches in the morning?  Yes  No  Don't Know

B8. Does your child get a headache at least once a month, on average?  
 Yes  No  Don't Know

B9. Did your child stop growing at a normal rate at any time since birth?  
 Yes  No  Don't Know

If so, please describe what happened:

---



---

B10. Does your child still have tonsils and/or adenoids?  Yes  No  Don't Know

If not, when were they removed?   yr   mo

B11. Has your child ever had a condition causing difficulty with breathing?

If so, please describe:  Yes  No  Don't Know

---



---

B12. Has your child ever had surgery?  Yes  No  Don't Know

B12a. If yes, did any difficulties with breathing occur before, during, or after surgery?  
 Yes  No  Don't Know

B13. Has your child ever become suddenly weak in the legs, or anywhere else, after laughing or being surprised by something?  
 Yes  No  Don't know

B15. Has your child ever felt unable to move for a short period, in bed, though awake and able to look around?  
 Yes  No  Don't know

B16. Has your child ever felt an irresistible urge to take a nap at times, forcing him or her to stop what he or she is doing in order to sleep?  
 Yes  No  Don't know

B17. Has your child ever sensed that he or she was dreaming (seeing images or hearing sounds) while still awake?  
 Yes  No  Don't know

B18. Does your child drink caffeinated beverages on a typical day (cola, tea, coffee)?  
 Yes  No  Don't know

B17a. If yes, how many cups or cans per day?



B26. How would you assess this child's activity level compared to other children of his or her age?

Much Less
Same
Much More

1
  2
 3
 4
 5

**Modified Epworth Sleepiness Scale**

How likely is your child to doze off or fall asleep in the situation described below, in contrast to just feeling tired?

- 0= No chance of dozing
- 1= Slight chance of dozing
- 2= Moderate chance of dozing

| Situation                                                             | Chance of dozing         |
|-----------------------------------------------------------------------|--------------------------|
| Sitting and reading                                                   | <input type="checkbox"/> |
| Watching TV                                                           | <input type="checkbox"/> |
| Sitting inactive in a public place (i.e., movie theater or classroom) | <input type="checkbox"/> |
| As a passenger in a car for an hour without a break                   | <input type="checkbox"/> |
| Laying down to rest in the afternoon when circumstances permit        | <input type="checkbox"/> |
| Sitting and talking to someone                                        | <input type="checkbox"/> |
| Sitting quietly after lunch                                           | <input type="checkbox"/> |
| In a car, while stopped for a few minutes in traffic                  | <input type="checkbox"/> |

**II.B Questions about the mother:**

Now I would like to ask you some questions about yourself (the child's biological mother)

48. Do you consider yourself Hispanic/ Latino?  Yes  No

49. Which of these groups best describes your racial background?

- Black/African American
- White
- Asian
- American Indian/Alaska Native
- Native Hawaiian or other Pacific Islander
- More than one race
- Unknown

50. Were you born in the U.S.?  Yes  No

other country (specify)

|  |  |  |  |  |  |  |  |  |  |  |  |  |  |  |  |  |  |  |  |
|--|--|--|--|--|--|--|--|--|--|--|--|--|--|--|--|--|--|--|--|
|  |  |  |  |  |  |  |  |  |  |  |  |  |  |  |  |  |  |  |  |
|--|--|--|--|--|--|--|--|--|--|--|--|--|--|--|--|--|--|--|--|

**If U.S. skip to question 52**

51. If born outside the U.S.: How long have you lived in the U.S.?

|  |  |
|--|--|
|  |  |
|--|--|

Years

|  |  |
|--|--|
|  |  |
|--|--|

Months

52. Was your mother born in the U.S.?  Yes  No

other country (specify)

|  |  |  |  |  |  |  |  |  |  |  |  |  |  |  |  |  |  |  |  |
|--|--|--|--|--|--|--|--|--|--|--|--|--|--|--|--|--|--|--|--|
|  |  |  |  |  |  |  |  |  |  |  |  |  |  |  |  |  |  |  |  |
|--|--|--|--|--|--|--|--|--|--|--|--|--|--|--|--|--|--|--|--|

53. Was your father born in the U.S.?  Yes  No

other country (specify)

|  |  |  |  |  |  |  |  |  |  |  |  |  |  |  |  |  |  |  |  |
|--|--|--|--|--|--|--|--|--|--|--|--|--|--|--|--|--|--|--|--|
|  |  |  |  |  |  |  |  |  |  |  |  |  |  |  |  |  |  |  |  |
|--|--|--|--|--|--|--|--|--|--|--|--|--|--|--|--|--|--|--|--|

54. What is your native language?

- English  Spanish  Haitian Creole  French  Portuguese

Other (Specify)

|  |  |  |  |  |  |  |  |  |  |  |  |  |  |  |  |  |  |  |  |
|--|--|--|--|--|--|--|--|--|--|--|--|--|--|--|--|--|--|--|--|
|  |  |  |  |  |  |  |  |  |  |  |  |  |  |  |  |  |  |  |  |
|--|--|--|--|--|--|--|--|--|--|--|--|--|--|--|--|--|--|--|--|

55. What is your present marital status?

- Married  Widowed  Divorced  Separated  Single

56. What is the highest grade of school you have completed to date?

- Elementary School
- Some secondary school (9th grade and above)
- High school graduate or GED
- Some college
- College degree
- Graduate school degree
- Post graduate (PhD / MD/ other)







**Peanut**

No

Yes, only when I was a child, but outgrew by   years

Yes, current allergy

If **YES**, was your food allergy diagnosed by a doctor?  Yes  No

How old were you when first diagnosed by a doctor?   Year(s)   Months

**Tree nut**

No

Yes, only when I was a child, but outgrew by   years

Yes, current allergy

If **YES**, was your food allergy diagnosed by a doctor?  Yes  No

How old were you when first diagnosed by a doctor?   Year(s)   Months

If yes, please choose the specific type (select all that apply):

- Almond
- Brazil
- Pistachio
- Cashew
- Macadamia
- Other
- Filbert/hazel
- Pecan
- Walnut
- Pine

**Fish**

No

Yes, only when I was a child, but outgrew by   years

Yes, current allergy

If **YES**, was your food allergy diagnosed by a doctor?  Yes  No

How old were you when first diagnosed by a doctor?   Year(s)   Months

If yes, please choose the specific type (select all that apply):

- Salmon
- Tuna
- Catfish
- Cod
- Flounder
- Halibut
- Trout
- Bass

Other

**Shellfish**

No

Yes, only when I was a child, but outgrew by   years

Yes, current allergy

If **YES**, was your food allergy diagnosed by a doctor?  Yes  No

How old were you when first diagnosed by a doctor?   Year(s)   Months

If yes, please choose the specific type (select all that apply):

- Shrimp
- Crab
- Lobster
- Clam
- Oyster
- Mussels

Other

**Seeds**

No

Yes, only when I was a child, but outgrew by   years

Yes, current allergy

If **YES**, was your food allergy diagnosed by a doctor?  Yes  No

How old were you when first diagnosed by a doctor?   Year(s)   Months

If yes, please choose the specific type (select all that apply):

- Sesame
- Sunflower
- Pumpkin
- Other





**The Berlin Questionnaire**

1. Do you snore?       Yes    No    Don't Know  
                                          **If NO skip to question 5**
2. Snoring loudness       Loud as breathing    Loud as talking    Louder than talking    Very Loud
3. Snoring frequency       Almost every day       3 to 4 times per week  
                                           1 to 2 times per week    1 to 2 times per month  
                                           Never to almost never
4. Does your snoring bother other people?       Yes    No    Don't Know
5. Has anyone ever noticed that you quit breathing during your sleep?  
                                           Almost every day       3 to 4 times per week  
                                           1 to 2 times per week    1 to 2 times per month  
                                           Never to almost never
6. How often do you feel tired or fatigued after sleep?  
                                           Almost every day       3 to 4 times per week  
                                           1 to 2 times per week    1 to 2 times per month  
                                           Never to almost never
7. How often do you feel tired during waketime?  
                                           Almost every day       3 to 4 times per week  
                                           1 to 2 times per week    1 to 2 times per month  
                                           Never to almost never
8. Have you ever nodded off or fallen asleep while driving a vehicle?       Yes    No
9. Do you have high blood pressure?       Yes    No    Don't Know

**Pittsburgh Sleep Quality Index (PSQI)**

The following questions relate to your usual sleep habits during the past month only. Your answers should indicate the most accurate reply for the majority of days and nights in the past month

1. During the past month, when have you usually gone to bed?   :
2. During the past month how long (in minutes) has it taken you to fall asleep each night?
3. During the past month, when have you usually gotten up in the morning?   :

4. How many actual hours of sleep do you get at night?   .

5. During the past month, how often have you had trouble sleeping because you...

|                                                                                                                                     | Not during<br>the past<br>month | Less than<br>once a<br>week | Once or<br>twice a<br>week | Three or<br>more times<br>a week |
|-------------------------------------------------------------------------------------------------------------------------------------|---------------------------------|-----------------------------|----------------------------|----------------------------------|
| a. Cannot get to sleep within 30 minutes                                                                                            | <input type="radio"/>           | <input type="radio"/>       | <input type="radio"/>      | <input type="radio"/>            |
| b. Wake up in the middle of the night or early morning                                                                              | <input type="radio"/>           | <input type="radio"/>       | <input type="radio"/>      | <input type="radio"/>            |
| c. Have to get up to use the bathroom                                                                                               | <input type="radio"/>           | <input type="radio"/>       | <input type="radio"/>      | <input type="radio"/>            |
| d. Cannot breathe comfortably                                                                                                       | <input type="radio"/>           | <input type="radio"/>       | <input type="radio"/>      | <input type="radio"/>            |
| e. Cough or snore loudly                                                                                                            | <input type="radio"/>           | <input type="radio"/>       | <input type="radio"/>      | <input type="radio"/>            |
| f. Feel too cold                                                                                                                    | <input type="radio"/>           | <input type="radio"/>       | <input type="radio"/>      | <input type="radio"/>            |
| g. Feel too hot                                                                                                                     | <input type="radio"/>           | <input type="radio"/>       | <input type="radio"/>      | <input type="radio"/>            |
| h. Have bad dreams                                                                                                                  | <input type="radio"/>           | <input type="radio"/>       | <input type="radio"/>      | <input type="radio"/>            |
| i. Have pain                                                                                                                        | <input type="radio"/>           | <input type="radio"/>       | <input type="radio"/>      | <input type="radio"/>            |
| j. Other reasons                                                                                                                    | <input type="radio"/>           | <input type="radio"/>       | <input type="radio"/>      | <input type="radio"/>            |
| 6. During the past month, how often have you taken medicine (prescribed or "over the counter") to help you sleep?                   | <input type="radio"/>           | <input type="radio"/>       | <input type="radio"/>      | <input type="radio"/>            |
| 7. During the past month, how often have you had trouble staying awake while driving, eating meals, or engaging in social activity? | <input type="radio"/>           | <input type="radio"/>       | <input type="radio"/>      | <input type="radio"/>            |
| 8. During the past month, how much of a problem has it been for you to keep up enthusiasm to get things done?                       | <input type="radio"/>           | <input type="radio"/>       | <input type="radio"/>      | <input type="radio"/>            |

If so, please describe the other reasons:

9. During the past month, how would you rate your sleep quality overall?

Very Good    Fairly Good    Fairly Bad    Very Bad

**Modified Epworth Sleepiness Scale**

How likely are you to doze off or fall asleep in the situation described below, in contrast to just feeling tired?

- 0= No chance of dozing  
 1= Slight chance of dozing  
 2= Moderate chance of dozing

| Situation                                                             | Chance of dozing                                  |
|-----------------------------------------------------------------------|---------------------------------------------------|
| Sitting and reading                                                   | <input type="checkbox"/>                          |
| Watching TV                                                           | <input type="checkbox"/>                          |
| Sitting inactive in a public place (i.e., movie theater or a meeting) | <input type="checkbox"/>                          |
| As a passenger in a car for an hour without a break                   | <input type="checkbox"/>                          |
| Laying down to rest in the afternoon when circumstances permit        | <input type="checkbox"/>                          |
| Sitting and talking to someone                                        | <input type="checkbox"/>                          |
| Sitting quietly after lunch                                           | <input type="checkbox"/>                          |
| In a car, while stopped for a few minutes in traffic                  | <input type="checkbox"/>                          |
| Total                                                                 | <input type="checkbox"/> <input type="checkbox"/> |



What field does his occupation fall under?

- Not Applicable  
 Management/ Business/ Administration  
 Financial/ Computer/ Mathematical  
 Architecture and Engineering  
 Life, Physical, and Social Science  
 Legal occupations  
 Education, Training, and Library  
 Sales, Arts, Design, Entertainment, and Media  
 Athletics (Sports, Dancing, etc)  
 Healthcare  
 Food preparation and Serving  
 Building and Grounds cleaning and Maintenance  
 Personal Care and Service  
 Farming, Fishing, and Forestry  
 Construction Trades  
 Extraction Workers  
 Installation, Maintenance, and Repair Workers  
 Production Occupations  
 Transportation and Material Moving  
 Military Specific  
 Other \_\_\_\_\_

77. What is his current height?  feet  inches or  cm

78. What is his current weight?  lbs or  kg

79. Does he have a personal history of asthma?

- No  
 Yes, only when he was a child, but outgrew by  Years  
 Yes, he has it now  
 Not sure

If YES, was his asthma diagnosed by a doctor?  Yes  No

How old was he when first diagnosed by a doctor?  Year(s)  Months

80. Has he ever used an inhaler or nebulizer?  Yes  No

81. Does he have a personal history of Eczema?

- No  
 Yes, only when he was a child, but outgrew by  Years  
 Yes, he has it now  
 Not sure

If YES, was his eczema diagnosed by a doctor?  Yes  No

How old was he when first diagnosed by a doctor?  Year(s)  Months







**Fish**

No

Yes, only when he was a child, but outgrew by   years

Yes, current allergy

If **YES**, was his food allergy diagnosed by a doctor?  Yes  No

How old was he when first diagnosed by a doctor?   Year(s)   Months

If yes, please choose the specific type (select all that apply):

Salmon  Tuna  Catfish  Cod  Flounder  Halibut  Trout  Bass

Other

**Shellfish**

No

Yes, only when he was a child, but outgrew by   years

Yes, current allergy

If **YES**, was his food allergy diagnosed by a doctor?  Yes  No

How old was he when first diagnosed by a doctor?   Year(s)   Months

If yes, please choose the specific type (select all that apply):

Shrimp  Crab  Lobster  Clam  Oyster  Mussels

Other

**Seeds**

No

Yes, only when he was a child, but outgrew by   years

Yes, current allergy

If **YES**, was his food allergy diagnosed by a doctor?  Yes  No

How old was he when first diagnosed by a doctor?   Year(s)   Months

If yes, please choose the specific type (select all that apply):

Sesame  Sunflower  Pumpkin Other

**Wheat**

No

Yes, only when he was a child, but outgrew by   years

Yes, current allergy

If **YES**, was his food allergy diagnosed by a doctor?  Yes  No

How old was he when first diagnosed by a doctor?   Year(s)   Months

**Soy/Tofu**

No

Yes, only when he was a child, but outgrew by   years

Yes, current allergy

If **YES**, was his food allergy diagnosed by a doctor?  Yes  No

How old was he when first diagnosed by a doctor?   Year(s)   Months

Other Foods

|  |  |  |  |  |  |  |  |  |  |  |  |  |  |  |  |  |  |  |  |
|--|--|--|--|--|--|--|--|--|--|--|--|--|--|--|--|--|--|--|--|
|  |  |  |  |  |  |  |  |  |  |  |  |  |  |  |  |  |  |  |  |
|--|--|--|--|--|--|--|--|--|--|--|--|--|--|--|--|--|--|--|--|

- Yes, only when he was a child, but outgrew by   years
- Yes, current allergy

If **YES**, was his food allergy diagnosed by a doctor?  Yes  No

How old was he when first diagnosed by a doctor?   Year(s)   Months

|  |  |  |  |  |  |  |  |  |  |  |  |  |  |  |  |  |  |  |  |
|--|--|--|--|--|--|--|--|--|--|--|--|--|--|--|--|--|--|--|--|
|  |  |  |  |  |  |  |  |  |  |  |  |  |  |  |  |  |  |  |  |
|--|--|--|--|--|--|--|--|--|--|--|--|--|--|--|--|--|--|--|--|

- Yes, only when he was a child, but outgrew by   years
- Yes, current allergy

If **YES**, was his food allergy diagnosed by a doctor?  Yes  No

How old was he when first diagnosed by a doctor?   Year(s)   Months

|  |  |  |  |  |  |  |  |  |  |  |  |  |  |  |  |  |  |  |  |
|--|--|--|--|--|--|--|--|--|--|--|--|--|--|--|--|--|--|--|--|
|  |  |  |  |  |  |  |  |  |  |  |  |  |  |  |  |  |  |  |  |
|--|--|--|--|--|--|--|--|--|--|--|--|--|--|--|--|--|--|--|--|

- Yes, only when he was a child, but outgrew by   years
- Yes, current allergy

If **YES**, was his food allergy diagnosed by a doctor?  Yes  No

How old was he when first diagnosed by a doctor?   Year(s)   Months

|  |  |  |  |  |  |  |  |  |  |  |  |  |  |  |  |  |  |  |  |
|--|--|--|--|--|--|--|--|--|--|--|--|--|--|--|--|--|--|--|--|
|  |  |  |  |  |  |  |  |  |  |  |  |  |  |  |  |  |  |  |  |
|--|--|--|--|--|--|--|--|--|--|--|--|--|--|--|--|--|--|--|--|

- Yes, only when he was a child, but outgrew by   years
- Yes, current allergy

If **YES**, was his food allergy diagnosed by a doctor?  Yes  No

How old was he when first diagnosed by a doctor?   Year(s)   Months

## III. Home Environment

90. What was your household income last year, before taxes? (INCLUDING PUBLIC ASSISTANCE)

- <\$5,000       \$5,000-9,999       \$10,000-14,999       15,000-19,999  
 \$20,000-24,000       \$25,000-29,999       \$30,000-34,999       \$35,000-39,999  
 \$40,000-49,999       \$50,000-59,999       \$60,000-79,999       \$80,000-99,999  
 >\$100,000       Don't know

91. Here are some questions about your current home:

a) How long have you lived in your current home?

Year(s)      Months

b) What type of housing is your home?

- Single Family     Duplex     Row House     Condo/Apartment     Trailer Home     Shelter

c) # of bedrooms

d) # of bathrooms   .

e) # of people who permanently live in your home

f) What type of fuel do you use for heating your home?

- Oil     Electricity     Gas    Other

g) What type of fuel do you use for cooking?

- Gas     Electric    Other

h) Do you have any wall to wall carpet in your home?     Yes     No

If yes, specify location:

- Living room  
 Family room  
 Dining room  
 Kitchen  
 Bedroom (master) parents  
 Bedroom Index Child  
 Bedroom Sib #1  
 Bedroom Sib #2  
 Basement  
 Bathroom

i) Approximately how old is the building/apartment/home you live in?

- 10 years or less     11-25 years     26-50 years     51-75 years     greater than 75 years

92. Do you (mother of the child) currently smoke or have you ever smoked cigarettes, cigars, or pipes?

- No, I never smoked  
 I used to smoke but I quit before becoming pregnant with index child  
 I used to smoke but I quit after becoming pregnant with index child  
 Yes, I currently smoke, however I did not smoke during pregnancy with index child  
 Yes, I currently smoke and I did smoke during pregnancy with the index child

If **YES**

What do/did you smoke?  cigarettes  cigars  pipes

Do you smoke inside the home?  Yes  No

How many (cigarettes, cigars, pipes) do you smoke per day?    
(Regardless of indoor or outdoor)

93. Does your child's father currently smoke or has he ever smoked cigarettes, cigars, or pipes?

- No, he never smoked  
 He used to smoke but quit before I became pregnant with index child  
 He used to smoke but quit after I became pregnant with index child  
 Yes, he currently smokes

If **YES**

What does/did he smoke?  cigarettes  cigars  pipes

Does he smoke inside the child's home?  Yes  No

How many (cigarettes, cigars, pipes) does he smoke per day?

94. Do other people who live in your home smoke cigarettes, cigars or pipes? (not including the mother and father of the child)?

Yes  No # of people

How many of them smoke inside the home?

95. Total number of cigarettes smoked inside your home per day

(Not including amount smoked by the mother and father of the child)
